# Supplementary material for: Potential prebiotic activity of Tenebrio molitor insect flour using an optimized in vitro gut microbiota model
Source: Royal Society of Chemistry journal article supplement (doi:10.1039/c8fo01536h), 2019-01-01
Supplement: c8fo01536h1.pdf [file c8fo01536h1.pdf]

1 **Supplementary materials**

2

3

4

5

6

7

8

9

10

11

12

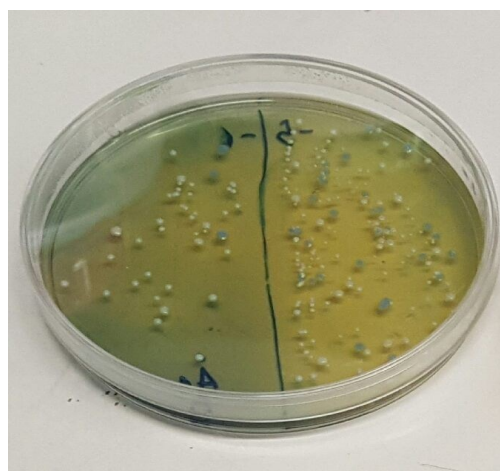

13 **Figure S1-** MRS-BPB with colony of *Lactobacillus* (light blue color) and *Bifidobacterium*  
 14 (dark blue color).

15

16

17 **Table S1-** log CFU/mL (means  $\pm$  SD) of the bacterial strains when in the nutritional stress  
 18 conditions model with or without TMIF.

19

| Bacterial specie<br>(log CFU/mL) | TMIF<br>condition | Time (h)         |                  |                  |                  |                  |                  |
|----------------------------------|-------------------|------------------|------------------|------------------|------------------|------------------|------------------|
|                                  |                   | 0                | 3                | 6                | 12               | 24               | 48               |
| <i>L. rhamnosus</i>              | Without           | 9.06 $\pm$ 0.082 | 9.15 $\pm$ 0.095 | 9.12 $\pm$ 0.156 | 9.26 $\pm$ 0.119 | 7.88 $\pm$ 0.321 | 4.25 $\pm$ 0.629 |
|                                  | With              | 9.02 $\pm$ 0.074 | 9.07 $\pm$ 0.055 | 9.20 $\pm$ 0.053 | 9.12 $\pm$ 0.091 | 8.78 $\pm$ 0.036 | 8.66 $\pm$ 0.032 |
| <i>L. casei</i>                  | Without           | 9.14 $\pm$ 0.042 | 9.13 $\pm$ 0.017 | 9.13 $\pm$ 0.013 | 9.12 $\pm$ 0.076 | 8.05 $\pm$ 0.076 | 5.34 $\pm$ 0.054 |
|                                  | With              | 9.07 $\pm$ 0.023 | 9.14 $\pm$ 0.020 | 9.19 $\pm$ 0.018 | 9.19 $\pm$ 0.056 | 8.83 $\pm$ 0.032 | 8.45 $\pm$ 0.054 |
| <i>L. acidophilus</i>            | Without           | 8.27 $\pm$ 0.015 | 8.23 $\pm$ 0.023 | 8.06 $\pm$ 0.086 | 7.40 $\pm$ 0.226 | 4.64 $\pm$ 0.347 | 3.08 $\pm$ 0.066 |
|                                  | With              | 8.47 $\pm$ 0.018 | 8.39 $\pm$ 0.032 | 8.38 $\pm$ 0.035 | 8.25 $\pm$ 0.043 | 7.72 $\pm$ 0.030 | 6.07 $\pm$ 0.152 |
| <i>B. animalis</i><br>Bb12       | Without           | 8.68 $\pm$ 0.030 | 8.47 $\pm$ 0.053 | 7.98 $\pm$ 0.050 | 7.02 $\pm$ 0.058 | 6.51 $\pm$ 0.009 | 6.24 $\pm$ 0.027 |
|                                  | With              | 8.74 $\pm$ 0.029 | 8.76 $\pm$ 0.032 | 8.74 $\pm$ 0.017 | 8.78 $\pm$ 0.041 | 8.71 $\pm$ 0.043 | 8.44 $\pm$ 0.112 |
| <i>B. animalis</i> Bo            | Without           | 9.13 $\pm$ 0.021 | 9.29 $\pm$ 0.037 | 9.21 $\pm$ 0.027 | 9.14 $\pm$ 0.017 | 8.05 $\pm$ 0.071 | 5.49 $\pm$ 0.153 |
|                                  | With              | 9.18 $\pm$ 0.010 | 9.30 $\pm$ 0.024 | 9.26 $\pm$ 0.016 | 9.22 $\pm$ 0.009 | 8.74 $\pm$ 0.015 | 7.53 $\pm$ 0.052 |
| <i>B. longum</i> BG3             | Without           | 8.99 $\pm$ 0.064 | 8.98 $\pm$ 0.091 | 9.15 $\pm$ 0.070 | 9.24 $\pm$ 0.033 | 7.18 $\pm$ 0.092 | 5.43 $\pm$ 0.075 |
|                                  | With              | 8.98 $\pm$ 0.053 | 9.08 $\pm$ 0.109 | 9.14 $\pm$ 0.064 | 9.17 $\pm$ 0.040 | 8.73 $\pm$ 0.015 | 7.19 $\pm$ 0.056 |

20

21

22

23

24

25

26

27

28 **Table S2-** log CFU/mL (means  $\pm$  SD) of the bacterial strains in monoculture when inoculated  
 29 in basal media with or without TMIF.

| Bacterial specie                  | Conditions | Time (h) | Without TMIF                    | With TMIF                       |
|-----------------------------------|------------|----------|---------------------------------|---------------------------------|
|                                   |            |          | Total viable cells (log CFU/mL) | Total viable cells (log CFU/mL) |
| <i>L. rhamnosus</i>               | 1%         | 0        | 6.97 $\pm$ 0.052                | 7.38 $\pm$ 0.090                |
|                                   |            | 24       | 7.37 $\pm$ 0.018                | 7.57 $\pm$ 0.044                |
|                                   |            | 48       | 7.39 $\pm$ 0.038                | 8.06 $\pm$ 0.072                |
|                                   | 10%        | 0        | 8.17 $\pm$ 0.038                | 8.20 $\pm$ 0.053                |
|                                   |            | 24       | 8.34 $\pm$ 0.027                | 8.27 $\pm$ 0.030                |
|                                   |            | 48       | 7.49 $\pm$ 0.026                | 8.25 $\pm$ 0.010                |
| <i>L. casei</i>                   | 1%         | 0        | 6.93 $\pm$ 0.061                | 7.29 $\pm$ 0.042                |
|                                   |            | 24       | 7.17 $\pm$ 0.026                | 7.72 $\pm$ 0.012                |
|                                   |            | 48       | 7.95 $\pm$ 0.036                | 7.75 $\pm$ 0.051                |
|                                   | 10%        | 0        | 8.26 $\pm$ 0.030                | 8.32 $\pm$ 0.026                |
|                                   |            | 24       | 8.33 $\pm$ 0.035                | 8.28 $\pm$ 0.040                |
|                                   |            | 48       | 7.56 $\pm$ 0.005                | 8.18 $\pm$ 0.024                |
| <i>L. acidophilus</i>             | 1%         | 0        | 6.46 $\pm$ 0.066                | 6.47 $\pm$ 0.104                |
|                                   |            | 24       | 7.01 $\pm$ 0.054                | 7.21 $\pm$ 0.096                |
|                                   |            | 48       | 6.99 $\pm$ 0.082                | 7.18 $\pm$ 0.033                |
|                                   | 10%        | 0        | 7.50 $\pm$ 0.049                | 7.56 $\pm$ 0.033                |
|                                   |            | 24       | 6.58 $\pm$ 0.018                | 6.91 $\pm$ 0.042                |
|                                   |            | 48       | 7.36 $\pm$ 0.012                | 7.57 $\pm$ 0.041                |
| <i>B. animalis</i><br><b>Bb12</b> | 1%         | 0        | 7.10 $\pm$ 0.052                | 7.09 $\pm$ 0.059                |
|                                   |            | 24       | 8.44 $\pm$ 0.013                | 7.96 $\pm$ 0.036                |
|                                   |            | 48       | 8.41 $\pm$ 0.078                | 8.17 $\pm$ 0.031                |
|                                   | 10%        | 0        | 8.07 $\pm$ 0.033                | 8.02 $\pm$ 0.052                |
|                                   |            | 24       | 8.17 $\pm$ 0.016                | 8.12 $\pm$ 0.076                |
|                                   |            | 48       | 8.07 $\pm$ 0.065                | 8.08 $\pm$ 0.084                |
| <i>B. animalis</i> <b>Bo</b>      | 1%         | 0        | 7.17 $\pm$ 0.064                | 7.20 $\pm$ 0.146                |
|                                   |            | 24       | 7.94 $\pm$ 0.040                | 8.01 $\pm$ 0.024                |
|                                   |            | 48       | 7.61 $\pm$ 0.077                | 7.74 $\pm$ 0.036                |
|                                   | 10%        | 0        | 7.65 $\pm$ 0.043                | 7.66 $\pm$ 0.017                |
|                                   |            | 24       | 8.51 $\pm$ 0.022                | 8.43 $\pm$ 0.040                |
|                                   |            | 48       | 8.48 $\pm$ 0.005                | 8.48 $\pm$ 0.009                |
| <i>B. longum</i> <b>BG3</b>       | 1%         | 0        | 6.92 $\pm$ 0.034                | 7.01 $\pm$ 0.087                |
|                                   |            | 24       | 7.94 $\pm$ 0.021                | 8.09 $\pm$ 0.052                |
|                                   |            | 48       | 7.99 $\pm$ 0.082                | 7.77 $\pm$ 0.052                |
|                                   | 10%        | 0        | 7.60 $\pm$ 0.032                | 7.60 $\pm$ 0.028                |
|                                   |            | 24       | 8.35 $\pm$ 0.007                | 8.41 $\pm$ 0.030                |
|                                   |            | 48       | 8.21 $\pm$ 0.024                | 8.49 $\pm$ 0.019                |

30

31

32

33

34

35

36

37

38 **Table S3-** log CFU/mL (means  $\pm$  SD) of the bacterial strains in consortium when inoculated  
 39 in basal media with or without TMIF.

| Sample         | Time (h) | Lactobacilli (log CFU/mL) | Bifidobacteria (log CFU/mL) |
|----------------|----------|---------------------------|-----------------------------|
| <b>A1</b>      | 0        | 7.89 $\pm$ 0.022          | 8.88 $\pm$ 0.048            |
|                | 24       | 8.71 $\pm$ 0.056          | 8.97 $\pm$ 0.060            |
|                | 48       | 8.14 $\pm$ 0.024          | 8.59 $\pm$ 0.056            |
| <b>A2</b>      | 0        | 7.55 $\pm$ 0.048          | 8.90 $\pm$ 0.051            |
|                | 24       | 7.94 $\pm$ 0.0050         | 9.06 $\pm$ 0.023            |
|                | 48       | 7.98 $\pm$ 0.006          | 8.24 $\pm$ 0.029            |
| <b>A1+TMIF</b> | 0        | 7.89 $\pm$ 0.021          | 8.89 $\pm$ 0.018            |
|                | 24       | 8.61 $\pm$ 0.018          | 8.83 $\pm$ 0.011            |
|                | 48       | 8.56 $\pm$ 0.025          | 8.53 $\pm$ 0.040            |
| <b>A2+TMIF</b> | 0        | 7.49 $\pm$ 0.014          | 8.90 $\pm$ 0.026            |
|                | 24       | 7.95 $\pm$ 0.008          | 8.89 $\pm$ 0.053            |
|                | 48       | 8.20 $\pm$ 0.032          | 8.62 $\pm$ 0.046            |
| <b>B1</b>      | 0        | 7.62 $\pm$ 0.052          | 9.02 $\pm$ 0.034            |
|                | 24       | 8.01 $\pm$ 0.038          | 9.03 $\pm$ 0.028            |
|                | 48       | 7.96 $\pm$ 0.013          | 8.46 $\pm$ 0.006            |
| <b>B2</b>      | 0        | 7.50 $\pm$ 0.032          | 8.94 $\pm$ 0.050            |
|                | 24       | 7.86 $\pm$ 0.043          | 8.90 $\pm$ 0.0055           |
|                | 48       | 7.71 $\pm$ 0.022          | 8.19 $\pm$ 0.019            |
| <b>B1+TMIF</b> | 0        | 7.50 $\pm$ 0.032          | 8.86 $\pm$ 0.018            |
|                | 24       | 8.13 $\pm$ 0.014          | 8.90 $\pm$ 0.048            |
|                | 48       | 7.89 $\pm$ 0.009          | 8.57 $\pm$ 0.012            |
| <b>B2+TMIF</b> | 0        | 7.52 $\pm$ 0.013          | 8.83 $\pm$ 0.032            |
|                | 24       | 7.86 $\pm$ 0.008          | 8.97 $\pm$ 0.008            |
|                | 48       | 8.10 $\pm$ 0.006          | 8.85 $\pm$ 0.053            |
| <b>C1</b>      | 0        | 7.89 $\pm$ 0.017          | 8.63 $\pm$ 0.023            |
|                | 24       | 7.89 $\pm$ 0.029          | 8.72 $\pm$ 0.046            |
|                | 48       | 8.01 $\pm$ 0.018          | 7.89 $\pm$ 0.030            |
| <b>C2</b>      | 0        | 7.79 $\pm$ 0.039          | 8.72 $\pm$ 0.014            |
|                | 24       | 7.82 $\pm$ 0.015          | 8.26 $\pm$ 0.012            |
|                | 48       | 7.92 $\pm$ 0.009          | 8.26 $\pm$ 0.0059           |
| <b>C1+TMIF</b> | 0        | 7.82 $\pm$ 0.063          | 8.64 $\pm$ 0.077            |
|                | 24       | 7.93 $\pm$ 0.013          | 8.67 $\pm$ 0.056            |
|                | 48       | 8.08 $\pm$ 0.034          | 8.14 $\pm$ 0.020            |
| <b>C2+TMIF</b> | 0        | 7.51 $\pm$ 0.034          | 8.74 $\pm$ 0.037            |
|                | 24       | 8.19 $\pm$ 0.019          | 8.88 $\pm$ 0.032            |
|                | 48       | 8.25 $\pm$ 0.014          | 8.80 $\pm$ 0.018            |
| <b>D1</b>      | 0        | 7.87 $\pm$ 0.064          | 8.79 $\pm$ 0.028            |
|                | 24       | 8.84 $\pm$ 0.019          | 9.12 $\pm$ 0.030            |
|                | 48       | 7.75 $\pm$ 0.054          | 8.08 $\pm$ 0.029            |
| <b>D2</b>      | 0        | 8.86 $\pm$ 0.012          | 8.80 $\pm$ 0.027            |
|                | 24       | 9.03 $\pm$ 0.016          | 8.73 $\pm$ 0.088            |
|                | 48       | 7.97 $\pm$ 0.018          | 7.93 $\pm$ 0.051            |
| <b>D1+TMIF</b> | 0        | 8.63 $\pm$ 0.010          | 8.98 $\pm$ 0.027            |
|                | 24       | 8.82 $\pm$ 0.013          | 8.95 $\pm$ 0.019            |
|                | 48       | 8.53 $\pm$ 0.026          | 8.67 $\pm$ 0.065            |
| <b>D2+TMIF</b> | 0        | 8.05 $\pm$ 0.035          | 8.20 $\pm$ 0.021            |
|                | 24       | 9.04 $\pm$ 0.004          | 8.64 $\pm$ 0                |
|                | 48       | 8.12 $\pm$ 0.056          | 8.12 $\pm$ 0.029            |

41 **Table S4-** Concentration (mg/mL, means  $\pm$  SD) of the organic acids produced along  
 42 fermentation time in samples with *Lactobacillus* strains. Nd – not detected. Different letters  
 43 mark statistically significant ( $p < 0.05$ ) differences between samples for each compound.

| Bacterial specie      | Conditions | Time (h) | [Butyrate] (mg/mL)               | [Propionate] (mg/mL)                      | [Acetate] (mg/mL)                | [Lactate] (mg/mL)                |
|-----------------------|------------|----------|----------------------------------|-------------------------------------------|----------------------------------|----------------------------------|
| <i>L. rhamnosus</i>   | 1%         | 24       | Nd <sup>a</sup>                  | 0.11 $\pm$ 0.013 <sup>a</sup>             | 0.050 $\pm$ 0.002 <sup>a</sup>   | 0.71 $\pm$ 0.045 <sup>a</sup>    |
|                       |            | 48       | Nd <sup>a</sup>                  | 0.13 $\pm$ 0.002 <sup>a</sup>             | 0.28 $\pm$ 0.003 <sup>a, b</sup> | 0.57 $\pm$ 0.003 <sup>a</sup>    |
|                       | 10%        | 24       | Nd <sup>a</sup>                  | 0.16 $\pm$ 0.003 <sup>a, b</sup>          | 1.19 $\pm$ 0.026 <sup>d, e</sup> | 0.72 $\pm$ 0.006 <sup>a</sup>    |
|                       |            | 48       | Nd <sup>a</sup>                  | 0.47 $\pm$ 0.014 <sup>b, c, d, e, f</sup> | 1.27 $\pm$ 0.011 <sup>d, e</sup> | 0.72 $\pm$ 0.003 <sup>a</sup>    |
|                       | 1%+TMIF    | 24       | 0.13 $\pm$ 0.104 <sup>a, b</sup> | 0.37 $\pm$ 0.248 <sup>a, b, c, d, e</sup> | 0.62 $\pm$ 0.381 <sup>b, c</sup> | 0.44 $\pm$ 0.296 <sup>a</sup>    |
|                       |            | 48       | 0.23 $\pm$ 0.006 <sup>b, c</sup> | 0.71 $\pm$ 0.002 <sup>f</sup>             | 1.28 $\pm$ 0.005 <sup>d, e</sup> | 0.85 $\pm$ 0.194 <sup>a</sup>    |
|                       | 10%+TMIF   | 24       | 0.28 $\pm$ 0.003 <sup>b, c</sup> | 0.77 $\pm$ 0.018 <sup>f</sup>             | 0.17 $\pm$ 0.002 <sup>a, b</sup> | 2.88 $\pm$ 0.030 <sup>b, c</sup> |
|                       |            | 48       | 0.26 $\pm$ 0 <sup>b, c</sup>     | 0.74 $\pm$ 0.010 <sup>f</sup>             | 1.62 $\pm$ 0.030 <sup>e, f</sup> | 2.63 $\pm$ 0.020 <sup>b</sup>    |
| <i>L. casei</i>       | 1%         | 24       | Nd <sup>a</sup>                  | 0.11 $\pm$ 0.002 <sup>a</sup>             | 0.30 $\pm$ 0.003 <sup>a, b</sup> | 0.58 $\pm$ 0.046 <sup>a</sup>    |
|                       |            | 48       | Nd <sup>a</sup>                  | 0.12 $\pm$ 0 <sup>a</sup>                 | 0.31 $\pm$ 0.006 <sup>a, b</sup> | 0.61 $\pm$ 0.014 <sup>a</sup>    |
|                       | 10%        | 24       | 0.22 $\pm$ 0.007 <sup>b, c</sup> | 0.61 $\pm$ 0.003 <sup>e, f</sup>          | 0.22 $\pm$ 0.002 <sup>a, b</sup> | 2.71 $\pm$ 0.015 <sup>b</sup>    |
|                       |            | 48       | 0.38 $\pm$ 0.002 <sup>c</sup>    | 0.37 $\pm$ 0.002 <sup>a, b, c, d, e</sup> | 1.01 $\pm$ 0 <sup>c, d</sup>     | 0.56 $\pm$ 0.006 <sup>a</sup>    |
|                       | 1%+TMIF    | 24       | 0.38 $\pm$ 0.016 <sup>c</sup>    | 2.66 $\pm$ 0.043 <sup>g</sup>             | 0.39 $\pm$ 0.028 <sup>a, b</sup> | 0.65 $\pm$ 0.011 <sup>a</sup>    |
|                       |            | 48       | 0.24 $\pm$ 0.002 <sup>b, c</sup> | 0.70 $\pm$ 0.002 <sup>f</sup>             | 1.40 $\pm$ 0.008 <sup>d, e</sup> | 0.87 $\pm$ 0.019 <sup>a</sup>    |
|                       | 10%+TMIF   | 24       | 0.23 $\pm$ 0.027 <sup>b, c</sup> | 0.80 $\pm$ 0.022 <sup>f</sup>             | 1.50 $\pm$ 0.040 <sup>e, f</sup> | 3.47 $\pm$ 0.004 <sup>d</sup>    |
|                       |            | 48       | 0.28 $\pm$ 0.003 <sup>b, c</sup> | 0.79 $\pm$ 0.003 <sup>f</sup>             | 1.94 $\pm$ 0.012 <sup>e, f</sup> | 2.98 $\pm$ 0.017 <sup>b, c</sup> |
| <i>L. acidophilus</i> | 1%         | 24       | 0.76 $\pm$ 0.044 <sup>d</sup>    | 0.14 $\pm$ 0.006 <sup>a</sup>             | 0.38 $\pm$ 0.010 <sup>a, b</sup> | 0.66 $\pm$ 0.025 <sup>a</sup>    |
|                       |            | 48       | 0.71 $\pm$ 0.024 <sup>d</sup>    | 0.72 $\pm$ 0.008 <sup>f</sup>             | 0.079 $\pm$ 0.001 <sup>a</sup>   | 0.68 $\pm$ 0.008 <sup>a</sup>    |
|                       | 10%        | 24       | 1.08 $\pm$ 0.10 <sup>e</sup>     | 0.23 $\pm$ 0.10 <sup>a, b, c, d</sup>     | 1.26 $\pm$ 0.025 <sup>d, e</sup> | 0.80 $\pm$ 0.044 <sup>a</sup>    |
|                       |            | 48       | 1.01 $\pm$ 0.002 <sup>e</sup>    | 0.28 $\pm$ 0.024 <sup>a, b, c, d</sup>    | 1.22 $\pm$ 0.024 <sup>d, e</sup> | 0.65 $\pm$ 0.013 <sup>a</sup>    |
|                       | 1% +TMIF   | 24       | 0.20 $\pm$ 0.011 <sup>b, c</sup> | 0.53 $\pm$ 0 <sup>c, d, e, f</sup>        | 1.53 $\pm$ 0.005 <sup>e, f</sup> | 0.83 $\pm$ 0.010 <sup>a</sup>    |
|                       |            | 48       | 0.21 $\pm$ 0.013 <sup>b, c</sup> | 0.55 $\pm$ 0.001 <sup>d, e, f</sup>       | 1.03 $\pm$ 0.002 <sup>c, d</sup> | 0.86 $\pm$ 0.007 <sup>a</sup>    |
|                       | 10%+TMIF   | 24       | 1.12 $\pm$ 0.014 <sup>e</sup>    | 0.23 $\pm$ 0.036 <sup>a, b, c, d</sup>    | 1.17 $\pm$ 0.014 <sup>d, e</sup> | 3.49 $\pm$ 0.060 <sup>d</sup>    |
|                       |            | 48       | 1.04 $\pm$ 0.013 <sup>e</sup>    | 0.21 $\pm$ 0.038 <sup>a, b, c</sup>       | 1.46 $\pm$ 0.010 <sup>d, e</sup> | 3.16 $\pm$ 0.046 <sup>c, d</sup> |

44  
 45  
 46  
 47  
 48  
 49  
 50  
 51

52 **Table S5-** Concentration (mg/mL, means  $\pm$  SD) of the organic acids produced along  
 53 fermentation time in samples with *Bifidobacterium* strains. Nd – not detected. Different letters  
 54 mark statistically significant ( $p < 0.05$ ) differences between samples for each compound.

55

| Bacterial specie           | Conditions | Time (h) | [Butyrate] (mg/mL)                     | [Propionate] (mg/mL)                         | [Acetate] (mg/mL)                    | [Lactate] (mg/mL)                |
|----------------------------|------------|----------|----------------------------------------|----------------------------------------------|--------------------------------------|----------------------------------|
| <i>B. animalis</i><br>Bb12 | 1%         | 24       | 0.11 $\pm$ 0.001 <sup>a</sup>          | 0.31 $\pm$ 0 <sup>a, b, c, d</sup>           | 0.035 $\pm$ 0.001 <sup>a, b, c</sup> | 0.28 $\pm$ 0.001 <sup>a, b</sup> |
|                            |            | 48       | 0.17 $\pm$ 0.003 <sup>a</sup>          | 0.47 $\pm$ 0.001 <sup>a, b, c, d, e</sup>    | 0.053 $\pm$ 0.002 <sup>a</sup>       | 0.43 $\pm$ 0.017 <sup>b, c</sup> |
|                            | 10%        | 24       | 0.19 $\pm$ 0.012 <sup>a</sup>          | 0.20 $\pm$ 0.057 <sup>a, b</sup>             | 0.43 $\pm$ 0.009 <sup>b, c</sup>     | 0.42 $\pm$ 0.006 <sup>b, c</sup> |
|                            |            | 48       | 0.44 $\pm$ 0.005 <sup>a, b, c</sup>    | 0.55 $\pm$ 0.077 <sup>b, c, d, e</sup>       | 0.50 $\pm$ 0.031 <sup>c</sup>        | 1.23 $\pm$ 0.032 <sup>h</sup>    |
|                            | 1%+TMIF    | 24       | 0.26 $\pm$ 0.006 <sup>a</sup>          | 0.22 $\pm$ 0.022 <sup>a, b, c</sup>          | 0.40 $\pm$ 0.002 <sup>b, c</sup>     | 0.44 $\pm$ 0.004 <sup>b, c</sup> |
|                            |            | 48       | 0.20 $\pm$ 0.005 <sup>a</sup>          | 0.58 $\pm$ 0.003 <sup>b, c, d, e, f, g</sup> | 1.23 $\pm$ 0.010 <sup>d</sup>        | 0.17 $\pm$ 0.007 <sup>a</sup>    |
|                            | 10%+TMIF   | 24       | 0.21 $\pm$ 0.006 <sup>a</sup>          | 0.58 $\pm$ 0 <sup>b, c, d, e, f</sup>        | 1.78 $\pm$ 0.010 <sup>f, g</sup>     | 0.17 $\pm$ 0.011 <sup>a</sup>    |
|                            |            | 48       | 0.53 $\pm$ 0.010 <sup>a, b, c, d</sup> | 0.57 $\pm$ 0.007 <sup>b, c, d, e, f</sup>    | 1.33 $\pm$ 0.003 <sup>d, e</sup>     | 0.41 $\pm$ 0.004 <sup>b, c</sup> |
| <i>B. animalis</i><br>Bo   | 1%         | 24       | 0.35 $\pm$ 0.006 <sup>a, b, c</sup>    | 0.13 $\pm$ 0.006 <sup>a</sup>                | 0.29 $\pm$ 0.004 <sup>a, b, c</sup>  | 0.46 $\pm$ 0.002 <sup>c</sup>    |
|                            |            | 48       | 0.18 $\pm$ 0.008 <sup>a</sup>          | 0.97 $\pm$ 0.093 <sup>g, h</sup>             | 0.049 $\pm$ 0.001 <sup>a</sup>       | 0.75 $\pm$ 0.019 <sup>e, f</sup> |
|                            | 10%        | 24       | 0.21 $\pm$ 0.005 <sup>a</sup>          | 0.55 $\pm$ 0.009 <sup>b, c, d, e</sup>       | 0.20 $\pm$ 0.055 <sup>a, b, c</sup>  | 2.97 $\pm$ 0.033 <sup>k</sup>    |
|                            |            | 48       | 0.76 $\pm$ 0 <sup>c, d, e</sup>        | 0.25 $\pm$ 0 <sup>a, b, c, d</sup>           | 0.24 $\pm$ 0 <sup>a, b, c</sup>      | 3.64 $\pm$ 0 <sup>m</sup>        |
|                            | 1%+TMIF    | 24       | 0.27 $\pm$ 0.001 <sup>a</sup>          | 0.95 $\pm$ 0.009 <sup>f, g, h</sup>          | 1.40 $\pm$ 0.037 <sup>d, e</sup>     | 0.90 $\pm$ 0.015 <sup>f, g</sup> |
|                            |            | 48       | 0.24 $\pm$ 0.010 <sup>a</sup>          | 0.97 $\pm$ 0.007 <sup>h</sup>                | 1.56 $\pm$ 0.034 <sup>d, e, f</sup>  | 1.06 $\pm$ 0.027 <sup>g</sup>    |
|                            | 10%+TMIF   | 24       | 0.22 $\pm$ 0 <sup>a</sup>              | 0.62 $\pm$ 0.005 <sup>d, e, f, g, h</sup>    | 1.57 $\pm$ 0.037 <sup>e, f</sup>     | 2.81 $\pm$ 0.009 <sup>i, k</sup> |
|                            |            | 48       | 0.98 $\pm$ 0.380 <sup>d, e</sup>       | 0.20 $\pm$ 0.051 <sup>a, b, c</sup>          | 2.10 $\pm$ 0.092 <sup>g, h</sup>     | 3.32 $\pm$ 0.033 <sup>l</sup>    |
| <i>B. longum</i><br>BG3    | 1%         | 24       | 0.20 $\pm$ 0.006 <sup>a</sup>          | 0.61 $\pm$ 0.290 <sup>d, e, f, g, h</sup>    | 0.058 $\pm$ 0.001 <sup>a</sup>       | 0.70 $\pm$ 0.016 <sup>d, e</sup> |
|                            |            | 48       | 0.15 $\pm$ 0 <sup>a</sup>              | 0.32 $\pm$ 0.003 <sup>a, b, c, d</sup>       | 0.10 $\pm$ 0.036 <sup>a, b</sup>     | 0.55 $\pm$ 0.010 <sup>c, d</sup> |
|                            | 10%        | 24       | 0.18 $\pm$ 0.010 <sup>a</sup>          | 0.49 $\pm$ 0.015 <sup>a, b, c, d, e</sup>    | 0.21 $\pm$ 0.004 <sup>a, b, c</sup>  | 2.74 $\pm$ 0.016 <sup>j</sup>    |
|                            |            | 48       | 0.18 $\pm$ 0.008 <sup>a</sup>          | 0.48 $\pm$ 0.0145 <sup>a, b, c, d, e</sup>   | 0.28 $\pm$ 0.028 <sup>a, b, c</sup>  | 2.52 $\pm$ 0.018 <sup>i</sup>    |
|                            | 1%+TMIF    | 24       | 0.76 $\pm$ 0.048 <sup>b, c, d, e</sup> | 0.44 $\pm$ 0.022 <sup>a, b, c, d, e</sup>    | 1.56 $\pm$ 0.070 <sup>d, e, f</sup>  | 0.80 $\pm$ 0.020 <sup>e, f</sup> |
|                            |            | 48       | 1.18 $\pm$ 0.110 <sup>e</sup>          | 0.48 $\pm$ 0.027 <sup>a, b, c, d, e</sup>    | 2.71 $\pm$ 0.187 <sup>i</sup>        | 0.78 $\pm$ 0.045 <sup>e, f</sup> |
|                            | 10%+TMIF   | 24       | 0.22 $\pm$ 0.002 <sup>a</sup>          | 0.59 $\pm$ 0.014 <sup>c, d, e, f, g</sup>    | 1.50 $\pm$ 0.001 <sup>d, e, f</sup>  | 2.73 $\pm$ 0.044 <sup>j</sup>    |
|                            |            | 48       | 0.29 $\pm$ 0.011 <sup>a, b</sup>       | 0.79 $\pm$ 0.024 <sup>e, f, g, h</sup>       | 2.25 $\pm$ 0.017 <sup>h</sup>        | 3.21 $\pm$ 0.095 <sup>l</sup>    |

56

57

58

59

60

61

62 **Table S6-** Concentration (mg/mL, means  $\pm$  SD) of the organic acids produced along  
63 fermentation time in samples with co-cultures and consortium. Nd – not detected. Different  
64 letters mark statistically significant ( $p < 0.05$ ) differences between samples for each compound.

| Sample         | Time (h) | [Butyrate] (mg/mL)                  | [Propionate] (mg/mL)             | [Acetate] (mg/mL)                               | [Lactate] (mg/mL)                |
|----------------|----------|-------------------------------------|----------------------------------|-------------------------------------------------|----------------------------------|
| <b>A1</b>      | 24       | 0.49 $\pm$ 0.014 <sup>a, b, c</sup> | 2.02 $\pm$ 0.008 <sup>b, c</sup> | 1.07 $\pm$ 0.008 <sup>a, b, c, d, e, f, g</sup> | 6.87 $\pm$ 0.083 <sup>b</sup>    |
|                | 48       | 0.45 $\pm$ 0.026 <sup>a, b, c</sup> | 1.93 $\pm$ 0.036 <sup>b, c</sup> | 1.01 $\pm$ 0.023 <sup>a, b, c, d, e, f, g</sup> | 7.08 $\pm$ 0.023 <sup>b</sup>    |
| <b>A2</b>      | 24       | 0.69 $\pm$ 0.501 <sup>b, c, d</sup> | 2.23 $\pm$ 0.002 <sup>b, c</sup> | 1.87 $\pm$ 0.014 <sup>f, g, h, i, j</sup>       | 7.22 $\pm$ 0.007 <sup>b</sup>    |
|                | 48       | 0.66 $\pm$ 0 <sup>b, c, d</sup>     | 2.16 $\pm$ 0 <sup>b, c</sup>     | 1.77 $\pm$ 0 <sup>d, e, f, g, h, i, j</sup>     | 7.33 $\pm$ 0 <sup>b</sup>        |
| <b>A1+TMIF</b> | 24       | 0.72 $\pm$ 0.010 <sup>b, c, d</sup> | 2.33 $\pm$ 0.004 <sup>b, c</sup> | 3.12 $\pm$ 0.025 <sup>k</sup>                   | 7.51 $\pm$ 0.002 <sup>b</sup>    |
|                | 48       | 0.79 $\pm$ 0.015 <sup>b, c, d</sup> | 2.38 $\pm$ 0.007 <sup>c</sup>    | 3.00 $\pm$ 0.013 <sup>k</sup>                   | 7.63 $\pm$ 0.026 <sup>b</sup>    |
| <b>A2+TMIF</b> | 24       | 0.78 $\pm$ 0.003 <sup>b, c, d</sup> | 2.38 $\pm$ 0.005 <sup>c</sup>    | 2.71 $\pm$ 0.017 <sup>j, k</sup>                | 7.53 $\pm$ 0.013 <sup>b</sup>    |
|                | 48       | 0.71 $\pm$ 0.003 <sup>b, c, d</sup> | 2.31 $\pm$ 0.002 <sup>b, c</sup> | 2.61 $\pm$ 0.021 <sup>i, j, k</sup>             | 7.84 $\pm$ 0.011 <sup>b</sup>    |
| <b>B1</b>      | 24       | 0.55 $\pm$ 0.005 <sup>a, b, c</sup> | 1.86 $\pm$ 0.005 <sup>b, c</sup> | 1.22 $\pm$ 0.005 <sup>a, b, c, d, e, f, g</sup> | 7.21 $\pm$ 0.070 <sup>b</sup>    |
|                | 48       | 0.71 $\pm$ 0.044 <sup>b, c, d</sup> | 2.19 $\pm$ 0.039 <sup>b, c</sup> | 1.80 $\pm$ 0.034 <sup>e, f, g, h, i, j</sup>    | 6.93 $\pm$ 0.241 <sup>b</sup>    |
| <b>B2</b>      | 24       | 0.77 $\pm$ 0.009 <sup>b, c, d</sup> | 2.38 $\pm$ 0.008 <sup>c</sup>    | 1.52 $\pm$ 0.032 <sup>b, c, d, e, f, g, h</sup> | 7.60 $\pm$ 0.134 <sup>b</sup>    |
|                | 48       | 0.70 $\pm$ 0.008 <sup>b, c, d</sup> | 2.22 $\pm$ 0.003 <sup>b, c</sup> | 1.92 $\pm$ 0.017 <sup>g, h, i, j</sup>          | 7.50 $\pm$ 0.004 <sup>b</sup>    |
| <b>B1+TMIF</b> | 24       | 0.62 $\pm$ 0.012 <sup>b, c, d</sup> | 2.14 $\pm$ 0.004 <sup>b, c</sup> | 2.53 $\pm$ 0.030 <sup>h, i, j, k</sup>          | 7.31 $\pm$ 0.062 <sup>b</sup>    |
|                | 48       | 0.78 $\pm$ 0.007 <sup>b, c, d</sup> | 2.42 $\pm$ 0.008 <sup>c</sup>    | 3.49 $\pm$ 0.021 <sup>k</sup>                   | 7.88 $\pm$ 0.016 <sup>b</sup>    |
| <b>B2+TMIF</b> | 24       | 0.51 $\pm$ 0.028 <sup>a, b, c</sup> | 1.97 $\pm$ 0.045 <sup>b, c</sup> | 2.67 $\pm$ 0.007 <sup>j, k</sup>                | 7.18 $\pm$ 0.197 <sup>b</sup>    |
|                | 48       | 0.41 $\pm$ 0.176 <sup>a, b</sup>    | 1.66 $\pm$ 0.656 <sup>b, c</sup> | 1.58 $\pm$ 0.580 <sup>c, d, f, g, h, i</sup>    | 5.74 $\pm$ 1.702 <sup>b</sup>    |
| <b>C1</b>      | 24       | 0.36 $\pm$ 0.278 <sup>a, b</sup>    | 1.18 $\pm$ 0.844 <sup>a, b</sup> | 0.78 $\pm$ 0.244 <sup>a, b, c, d, e</sup>       | 4.48 $\pm$ 2.31 <sup>a, b</sup>  |
|                | 48       | 0.52 $\pm$ 0.015 <sup>a, b, c</sup> | 1.90 $\pm$ 0.012 <sup>b, c</sup> | 0.52 $\pm$ 0.004 <sup>a, b</sup>                | 6.76 $\pm$ 0.019 <sup>b</sup>    |
| <b>C2</b>      | 24       | 0.64 $\pm$ 0.006 <sup>b, c, d</sup> | 2.02 $\pm$ 0.005 <sup>b, c</sup> | 1.02 $\pm$ 0.055 <sup>a, b, c, d, e, f, g</sup> | 7.12 $\pm$ 0.036 <sup>b</sup>    |
|                | 48       | 0.57 $\pm$ 0.006 <sup>a, b, c</sup> | 2.19 $\pm$ 0.006 <sup>b, c</sup> | 0.63 $\pm$ 0.001 <sup>a, b, c</sup>             | 7.23 $\pm$ 0.010 <sup>b</sup>    |
| <b>C1+TMIF</b> | 24       | 0.76 $\pm$ 0.035 <sup>b, c, d</sup> | 2.24 $\pm$ 0.159 <sup>b, c</sup> | 0.73 $\pm$ 0.220 <sup>a, b, c, d</sup>          | 6.74 $\pm$ 1.629 <sup>b</sup>    |
|                | 48       | 1.12 $\pm$ 0.024 <sup>d</sup>       | 2.19 $\pm$ 0.002 <sup>b, c</sup> | 0.46 $\pm$ 0.008 <sup>a</sup>                   | 5.70 $\pm$ 1.543 <sup>b</sup>    |
| <b>C2+TMIF</b> | 24       | 0.57 $\pm$ 0.004 <sup>a, b, c</sup> | 2.27 $\pm$ 0.021 <sup>b, c</sup> | 0.47 $\pm$ 0 <sup>a</sup>                       | 7.30 $\pm$ 0.035 <sup>b</sup>    |
|                | 48       | 0.94 $\pm$ 0.345 <sup>c, d</sup>    | 2.24 $\pm$ 0.010 <sup>b, c</sup> | 0.47 $\pm$ 0.001 <sup>a</sup>                   | 7.39 $\pm$ 0.019 <sup>b</sup>    |
| <b>D1</b>      | 24       | 0.43 $\pm$ 0.003 <sup>a, b</sup>    | 2.11 $\pm$ 0.012 <sup>b, c</sup> | 0.84 $\pm$ 0.190 <sup>a, b, c, d, e, f</sup>    | 4.34 $\pm$ 0.003 <sup>a, b</sup> |
|                | 48       | 0.43 $\pm$ 0.001 <sup>a, b</sup>    | 2.11 $\pm$ 0.005 <sup>b, c</sup> | 1.03 $\pm$ 0.007 <sup>a, b, c, d, e, f, g</sup> | 4.36 $\pm$ 0.033 <sup>a, b</sup> |
| <b>D2</b>      | 24       | 0.39 $\pm$ 0.004 <sup>a, b</sup>    | 2.00 $\pm$ 0.005 <sup>b, c</sup> | 0.98 $\pm$ 0.027 <sup>a, b, c, d, e, f, g</sup> | 5.67 $\pm$ 1.530 <sup>b</sup>    |
|                | 48       | 0.36 $\pm$ 0.002 <sup>a, b</sup>    | 1.98 $\pm$ 0.006 <sup>b, c</sup> | 0.96 $\pm$ 0 <sup>a, b, c, d, e, f, g</sup>     | 4.33 $\pm$ 0 <sup>a, b</sup>     |
| <b>D1+TMIF</b> | 24       | 0.46 $\pm$ 0.010 <sup>a, b, c</sup> | 1.79 $\pm$ 0.056 <sup>b, c</sup> | 0.86 $\pm$ 0.019 <sup>a, b, c, d, e, f</sup>    | 6.93 $\pm$ 0.028 <sup>b</sup>    |
|                | 48       | 0.091 $\pm$ 0.026 <sup>a</sup>      | 0.22 $\pm$ 0.086 <sup>a</sup>    | 0.32 $\pm$ 0.210 <sup>a</sup>                   | 0.94 $\pm$ 0.301 <sup>a</sup>    |
| <b>D2+TMIF</b> | 24       | 0.46 $\pm$ 0.053 <sup>a, b, c</sup> | 2.24 $\pm$ 0.329 <sup>b, c</sup> | 1.78 $\pm$ 0.694 <sup>d, e, f, g, h, i, j</sup> | 7.95 $\pm$ 0.318 <sup>b</sup>    |
|                | 48       | 0.51 $\pm$ 0.005 <sup>a, b, c</sup> | 1.94 $\pm$ 0.028 <sup>b, c</sup> | 0.92 $\pm$ 0.012 <sup>a, b, c, d, e, f, g</sup> | 7.82 $\pm$ 0.047 <sup>b</sup>    |
